# Supplementary material for: Aggregation of α-crystallins in kynurenic acid-sensitized UVA photolysis under anaerobic conditions
Source: Royal Society of Chemistry journal article supplement (doi:10.1039/c5cp06693j), 2015-12-16
Supplement: c5cp06693j1.pdf [file c5cp06693j1.pdf]

## Support Information

“Aggregation of  $\alpha$ -crystallins in kynurenic acid-sensitized UVA photolysis under anaerobic conditions”

by

Peter S. Sherin,<sup>1,2\*</sup> Ekaterina A. Zelentsova,<sup>1,2</sup> Ekaterina D. Sormacheva,<sup>1,2</sup> Vadim V. Yanshole,<sup>1,2</sup>  
Tatyana G. Duzhak,<sup>1,2</sup> Yuri P. Tsentalovich<sup>1,2</sup>

<sup>1</sup>International Tomography Center SB RAS, Institutskaya street 3a, Novosibirsk, Russia

<sup>2</sup>Novosibirsk State University, Pirogova street 2, Novosibirsk, Russia

### Table of content:

|           |                                                                                                                                                                                                                                                                                                                                                               |                      |
|-----------|---------------------------------------------------------------------------------------------------------------------------------------------------------------------------------------------------------------------------------------------------------------------------------------------------------------------------------------------------------------|----------------------|
| Figure S1 | Concentration dependencies of the observed rate constant of the triplet KNA quenching in reactions with <i>L</i> -tryptophan, <i>L</i> -tyrosine, <i>L</i> -cysteine, oxygen, ascorbic acid, glutathione and $\alpha$ -crystallin in PBS and PBS / 6 M urea solutions.                                                                                        | Page 2               |
| Figure S2 | Fluorescence emission spectra of purified $\alpha$ -crystallin after 20 min of KNA-sensitized UVA photolysis in the absence and presence of antioxidants or 6 M urea recorded with the excitation at 325 nm.                                                                                                                                                  | Page 3               |
| Figure S3 | 15% SDS-PAGE of $\alpha$ -crystallin after UVA photolysis in PBS solution.                                                                                                                                                                                                                                                                                    | Page 4               |
| Figure S4 | 15% SDS-PAGE of $\alpha$ -crystallin after KNA-sensitized UVA photolysis. The protein samples treated with and without $\beta$ -mercaptoethanol before loading onto the gel.                                                                                                                                                                                  | Page 4               |
| Figure S5 | Time dependences of concentrations of Trp- and Tyr-containing peptides of $\alpha$ -crystallin after KNA-sensitized UVA photolysis.                                                                                                                                                                                                                           | Page 5               |
| Figure S6 | Time dependences of concentrations of $\alpha$ -crystallin peptides with oxidized Met residues, with modifications +13.979 Da and +31.988 Da and the doubly oxidized of W9 of $\alpha$ A-crystallin.<br>MS/MS spectra, theoretical and experimental m/z values for b- and y-ions formed under the fragmentation of modified peptides of $\alpha$ -crystallin. | Page 6<br>Pages 7-16 |
|           | 1-11 residues of $\alpha$ A crystallin, Trp9-2.017 Da                                                                                                                                                                                                                                                                                                         | Page 7               |
|           | 1-11 residues of $\alpha$ A crystallin, Ac-Met1+15.995 Da                                                                                                                                                                                                                                                                                                     | Page 8               |
|           | 1-11 residues of $\alpha$ A crystallin, Trp9+15.995 Da                                                                                                                                                                                                                                                                                                        | Page 9               |
|           | 1-11 residues of $\alpha$ A crystallin, Trp9+31.988 Da                                                                                                                                                                                                                                                                                                        | Page 10              |
|           | 1-11 residues of $\alpha$ B crystallin, Trp9-2.017 Da                                                                                                                                                                                                                                                                                                         | Page 11              |
|           | 1-11 residues of $\alpha$ B crystallin, Ac-Met1+15.995 Da                                                                                                                                                                                                                                                                                                     | Page 12              |
|           | 1-11 residues of $\alpha$ B crystallin, Trp9+15.995 Da                                                                                                                                                                                                                                                                                                        | Page 13              |
|           | 57-69 residues of $\alpha$ B crystallin, Trp60-2.017 Da                                                                                                                                                                                                                                                                                                       | Page 14              |
|           | 57-69 residues of $\alpha$ B crystallin, Met68+15.995 Da                                                                                                                                                                                                                                                                                                      | Page 15              |
|           | 57-69 residues of $\alpha$ B crystallin, Trp60+15.995 Da                                                                                                                                                                                                                                                                                                      | Page 16              |

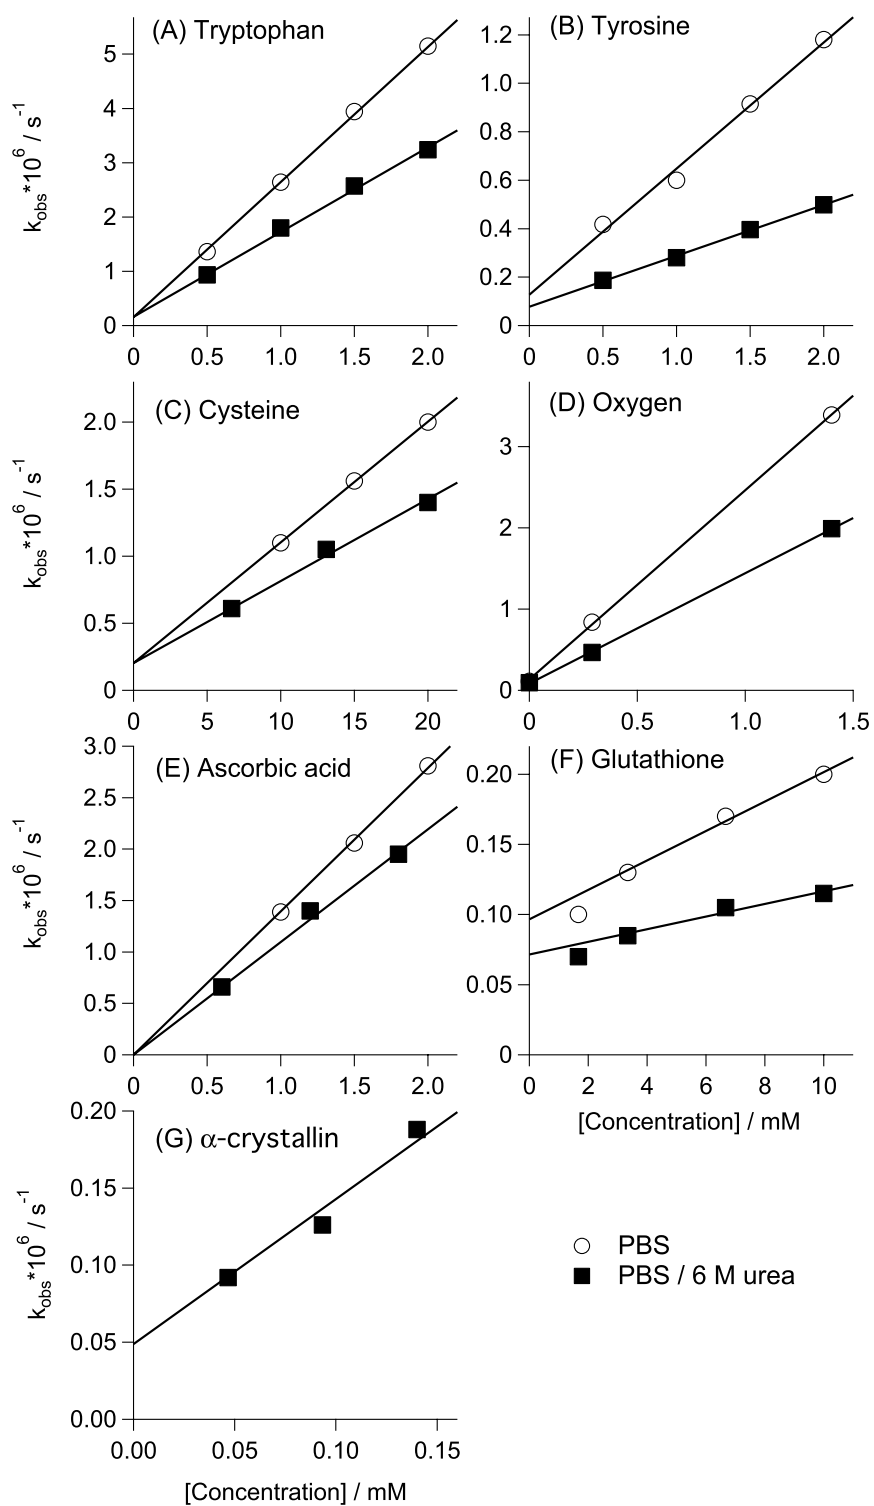

Figure S1. Concentration dependencies of the observed rate constant ( $k_{\text{obs}}$ ) of the triplet KNA quenching in reactions with (A) *L*-tryptophan, (B) *L*-tyrosine, (C) *L*-cysteine, (D) oxygen, (E) ascorbic acid, (F) glutathione and (G)  $\alpha$ -crystallin in PBS (open circles) and PBS / 6 M urea solution (filled squares).

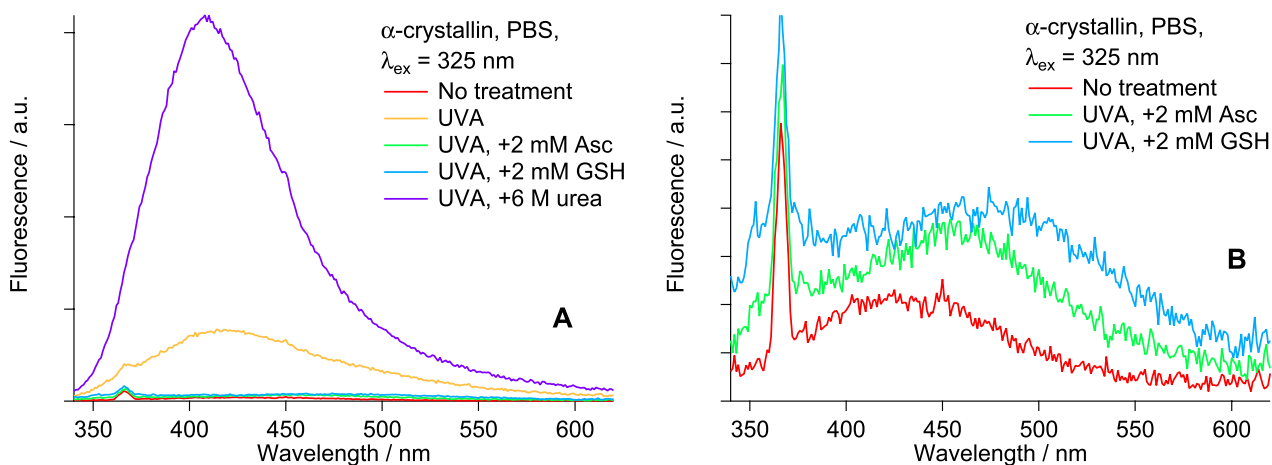

Figure S2. (A) Fluorescence emission spectra of purified  $\alpha$ -crystallin after 20 min of KNA-sensitized UVA photolysis in the absence and presence of antioxidants or 6 M urea recorded with the excitation at 325 nm. (B) The same spectra on smaller scale. Peaks at 366 nm on emission spectra are signals from Raman scattering.

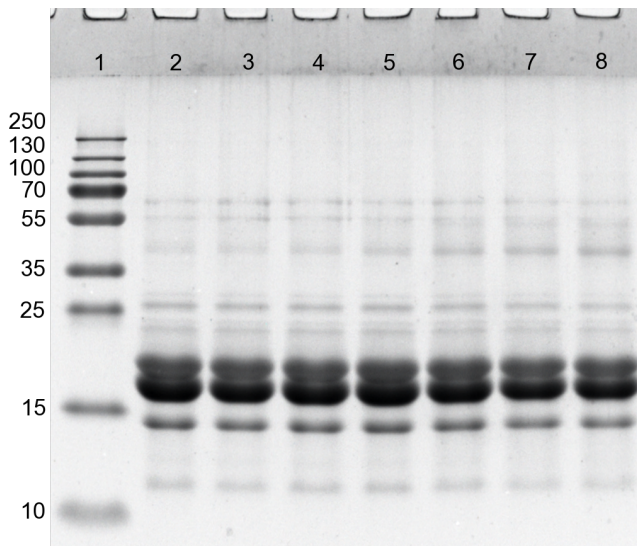

Figure S3. 15% SDS-PAGE of  $\alpha$ -crystallin after UVA photolysis in PBS solution. Lane 1 – molecular mass standards (kDa); lane 2 –  $\alpha$ -crystallin without any treatment; lane 3 – after 20 min of argon bubbling; lanes 4-8 –after 1, 2, 5, 10, and 20 min of UVA photolysis.

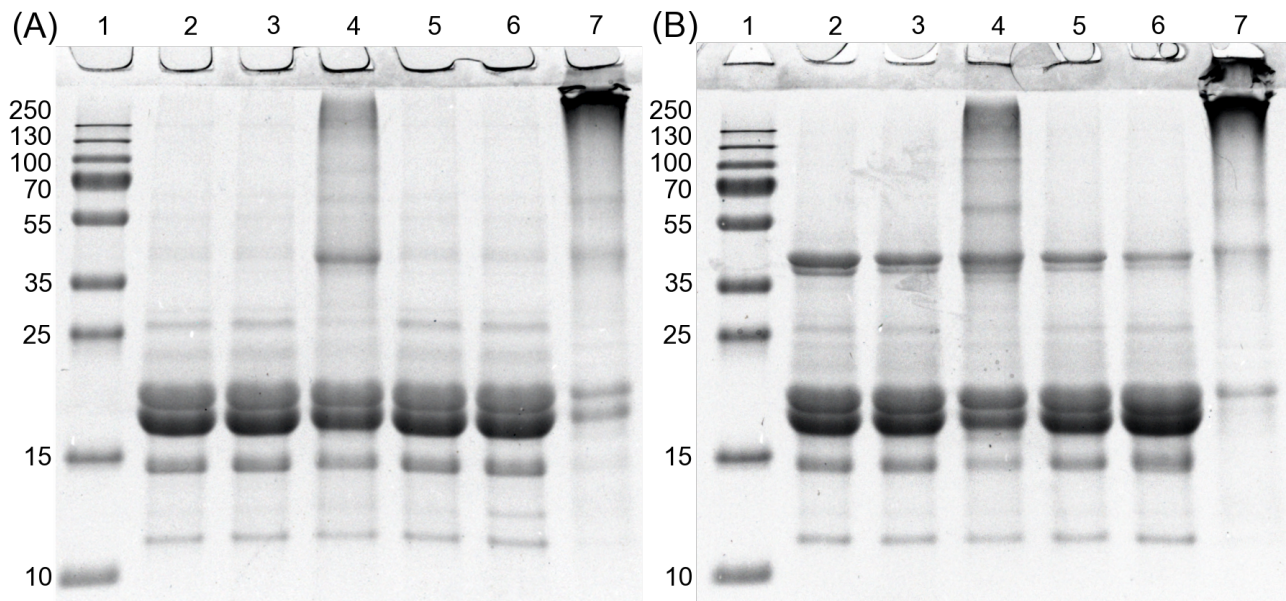

Figure S4. 15% SDS-PAGE of  $\alpha$ -crystallin after KNA-sensitized UVA photolysis. The protein samples treated (A) with  $\beta$ -mercaptoethanol and (B) without  $\beta$ -mercaptoethanol before loading onto the gel. For both gels: lane 1 – molecular mass standards (kDa); lane 2 –  $\alpha$ -crystallin without any treatment; lane 3 – after 20 min of argon bubbling; lane 4 – after 20 min of photolysis in the absence of antioxidants; lane 5 – after 20 min of photolysis in the presence of 2 mM Asc; lane 6 – after 20 min of photolysis in the presence of 2 mM GSH; lane 7 – after 20 min of UVA photolysis in 6 M urea.

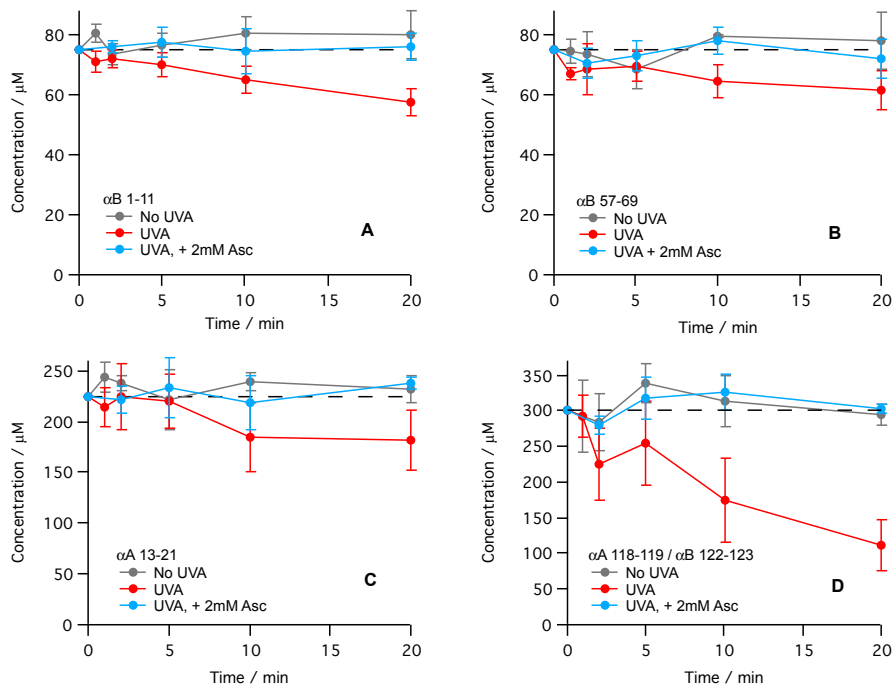

Figure S5. Time dependences of concentrations of  $\alpha$ -crystallin peptides: (A) residues 1-11 of  $\alpha$ B-crystallin (Trp9), (B) residues 57-69 of  $\alpha$ B-crystallin (Trp60); (C) residues 13-21 of  $\alpha$ A-crystallin (Tyr18); (D) residues 118-119 of  $\alpha$ A-crystallin (Tyr118) and residues 122-123 of  $\alpha$ B-crystallin (Tyr122). Grey circles – control non-irradiated sample; red circles – KNA-sensitized UVA photolysis; blue circles – the same photolysis in the presence of 2 mM Asc. Each point is the average value  $\pm$  standard deviation of three independent experiments.

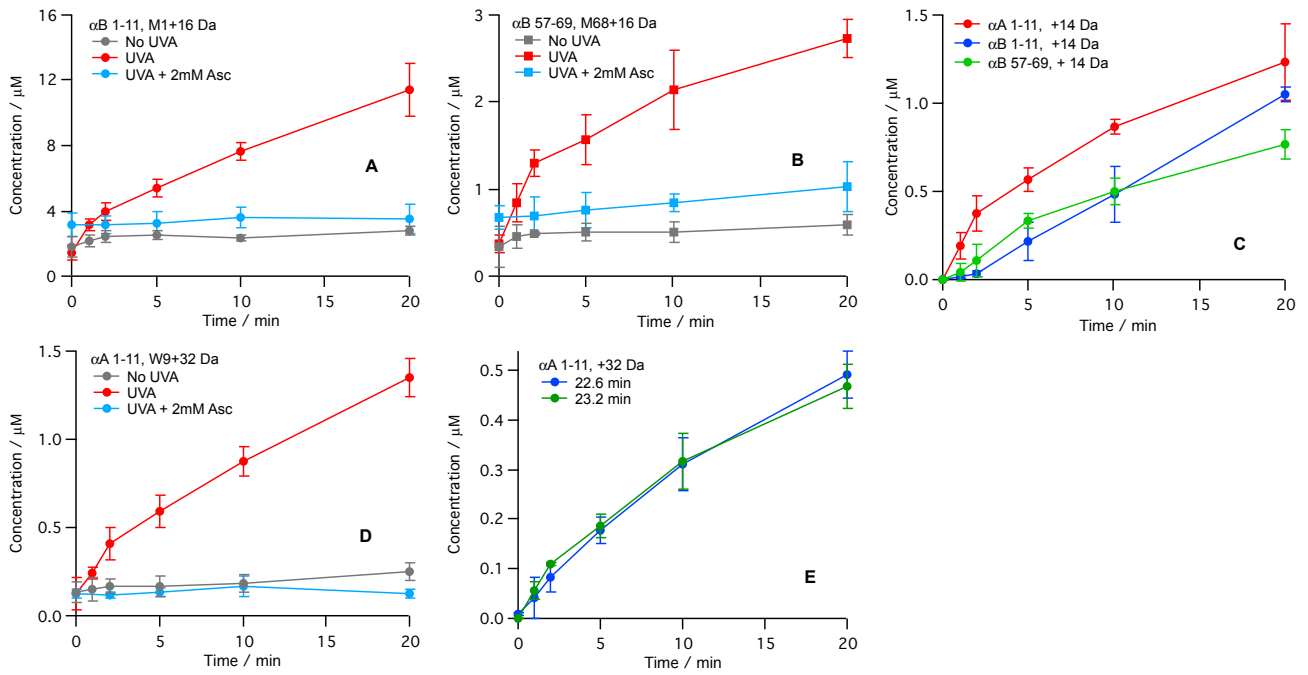

Figure S6. Time dependences of concentrations of  $\alpha$ -crystallin peptides: (A) residues 1-11 of  $\alpha\text{B}$ -crystallin with oxidized Met1; (B) residues 57-69 of  $\alpha\text{B}$ -crystallin with oxidized Met68; (D) residues 1-11 of  $\alpha\text{A}$ -crystallin with doubly oxidized Trp9. Grey circles – control non-irradiated sample; red circles – KNA-sensitized UVA photolysis; blue circles – the same photolysis in the presence of 2 mM Asc. (C) Time dependences of concentrations of 1-11 residues of  $\alpha\text{A}$ -crystallin peptide, 1-11 and 57-69 residues of  $\alpha\text{B}$ -crystallin peptides (red, blue and green circles, respectively) with modification +13.979 Da. (E) Time dependences of concentrations of 1-11 residues of  $\alpha\text{A}$ -crystallin peptide with modification +31.988 Da eluted at 22.6 and 23.2 min (blue and green circles, respectively). Each point is the average value  $\pm$  standard deviation of three independent experiments.

## MS/MS data

All theoretical m/z and pI values for peptides under MS/MS analysis were calculated with Fragment Ion Calculator:

<http://db.systemsbiology.net:8080/proteomicsToolkit/FragIonServlet.html>

**$\alpha$ A crystallin, W9-2.017 Da**  
Sequence: Ac-MDIAIQHPWFK, pI: 6.49531

Retention time 27.3 min  
**Fragmentation of 713.35 (M+2H)<sup>2+</sup>**

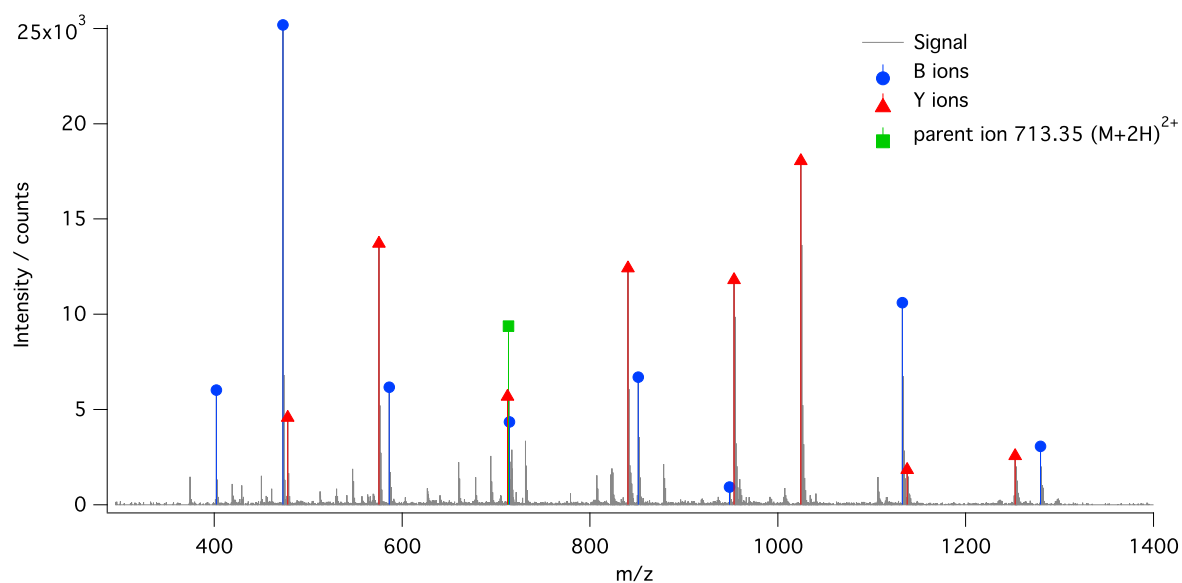

Fragment Ion Table, monoisotopic masses

| Seq  | #  | (Exp)                           | B          | Y          | (Exp)       | # (+1) |
|------|----|---------------------------------|------------|------------|-------------|--------|
| Ac-M | 1  |                                 | 174.05896  | 1425.69904 |             | 11     |
| D    | 2  |                                 | 289.08590  | 1252.64796 | (1252.6313) | 10     |
| I    | 3  | (402.1717)                      | 402.16996  | 1137.62102 | (1137.6105) | 9      |
|      |    | (374.1721 -CO, a <sub>3</sub> ) |            |            |             |        |
| A    | 4  | (473.2069)                      | 473.20708  | 1024.53695 | (1024.5305) | 8      |
| I    | 5  | (586.2899)                      | 586.29114  | 953.49984  | (953.4972)  | 7      |
| Q    | 6  | (714.3522)                      | 714.34972  | 840.41578  | (840.4141)  | 6      |
| H    | 7  | (851.4026)                      | 851.40863  | 712.35720  | (712.3529)  | 5      |
| P    | 8  | (948.4545)                      | 948.46139  | 575.29829  | (575.2957)  | 4      |
| W-2  | 9  | (1132.5251)                     | 1132.52510 | 478.24552  | (478.2423)  | 3      |
| F    | 10 | (1279.5948)                     | 1279.59352 | 294.18181  |             | 2      |
| K    | 11 |                                 | 1407.68848 | 147.11340  |             | 1      |

## Mass/Charge Table

|                      | Mass       |            |
|----------------------|------------|------------|
|                      | Mono       | Avg        |
| (M)                  | 1424.69122 | 1425.64149 |
| (M+H) <sup>+</sup>   | 1425.69904 | 1426.64943 |
| (M+2H) <sup>2+</sup> | 713.35346  | 713.82871  |
| (M+3H) <sup>3+</sup> | 475.90493  | 476.22180  |
| (M+4H) <sup>4+</sup> | 357.18066  | 357.41835  |

Modifications:

\* To residue W added the value -2.0156

\* N-terminus modification: 42.0106

**$\alpha$ A crystallin, M1+15.995**  
 Sequence: Ac-MDIAIQHPWFK, pI: 6.49531

Retention time 21.6 min  
**Fragmentation of 722.35 (M+2H)<sup>2+</sup>**

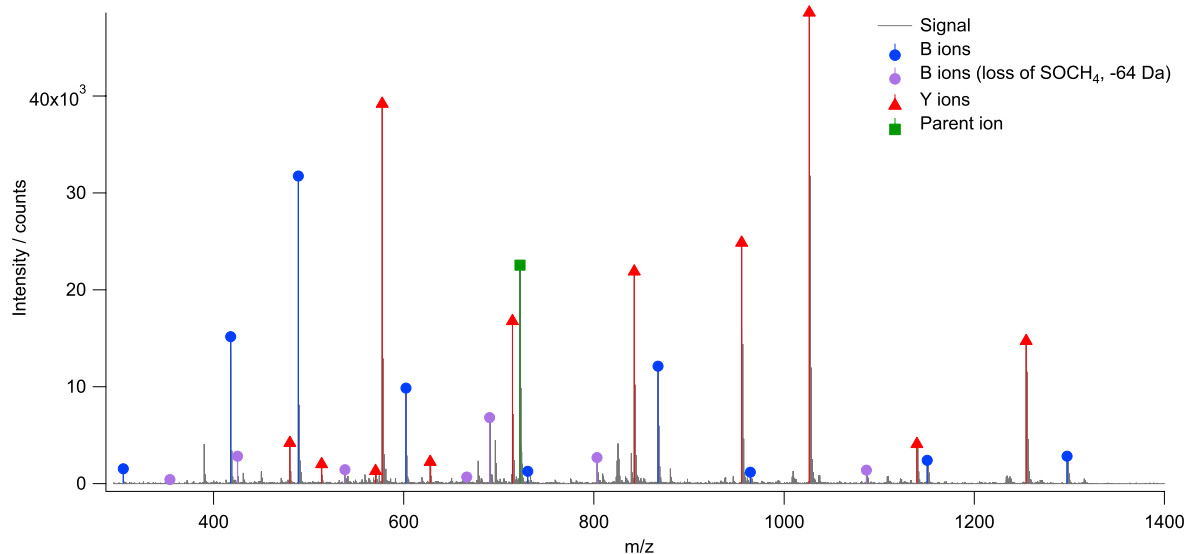

Fragment Ion Table, monoisotopic masses

| Seq     | #  | (Exp)                                                                               | B          | Y          | (Exp)                                        | # (+1) |
|---------|----|-------------------------------------------------------------------------------------|------------|------------|----------------------------------------------|--------|
| Ac-M+16 | 1  |                                                                                     | 190.05386  | 1443.70954 |                                              | 11     |
| D       | 2  | (305.0808)                                                                          | 305.08080  | 1254.66356 | (1254.6573)<br>(627.8278 M+2H <sup>+</sup> ) | 10     |
| I       | 3  | (418.1641)<br>(390.1680 -CO / a <sub>3</sub> ion)<br>(354.1630 -SOCH <sub>4</sub> ) | 418.16486  | 1139.63662 | (1139.6344)<br>(570.3174 M+2H <sup>+</sup> ) | 9      |
| A       | 4  | (489.2001)<br>(425.2043 -SOCH <sub>4</sub> )                                        | 489.20198  | 1026.55255 | (1026.5496)<br>(513.7803 M+2H <sup>+</sup> ) | 8      |
| I       | 5  | (602.2871)<br>(538.2901 -SOCH <sub>4</sub> )                                        | 602.28604  | 955.51544  | (955.5113)                                   | 7      |
| Q       | 6  | (730.3441)<br>(666.3310 -SOCH <sub>4</sub> )                                        | 730.34462  | 842.43138  | (842.4297)                                   | 6      |
| H       | 7  | (867.3979)<br>(803.4007 -SOCH <sub>4</sub> )                                        | 867.40353  | 714.37280  | (714.3768)                                   | 5      |
| P       | 8  | (964.4513)                                                                          | 964.45629  | 577.31389  | (577.3100)                                   | 4      |
| W       | 9  | (1150.5298)<br>(1086.5310 -SOCH <sub>4</sub> )                                      | 1150.53560 | 480.26112  | (480.2571)                                   | 3      |
| F       | 10 | (1297.6064)                                                                         | 1297.60402 | 294.18181  |                                              | 2      |
| K       | 11 |                                                                                     | 1425.69898 | 147.11340  |                                              | 1      |

Mass/Charge Table

|                      | Mass       |            |
|----------------------|------------|------------|
|                      | Mono       | Avg        |
| (M)                  | 1442.70172 | 1443.65199 |
| (M+H) <sup>+</sup>   | 1443.70954 | 1444.65993 |
| (M+2H) <sup>2+</sup> | 722.35871  | 722.83395  |
| (M+3H) <sup>3+</sup> | 481.90843  | 482.22530  |
| (M+4H) <sup>4+</sup> | 361.68329  | 361.92097  |

Modifications:

\* To residue M added the value 15.9949

\* N-terminus modification: 42.0106



**$\alpha$ A crystallin, W9+15.995**  
 Sequence: Ac-MDIAIQHPWFK, pI: 6.49531

Retention time 23.1 min  
**Fragmentation of 722.35 (M+2H)<sup>2+</sup>**

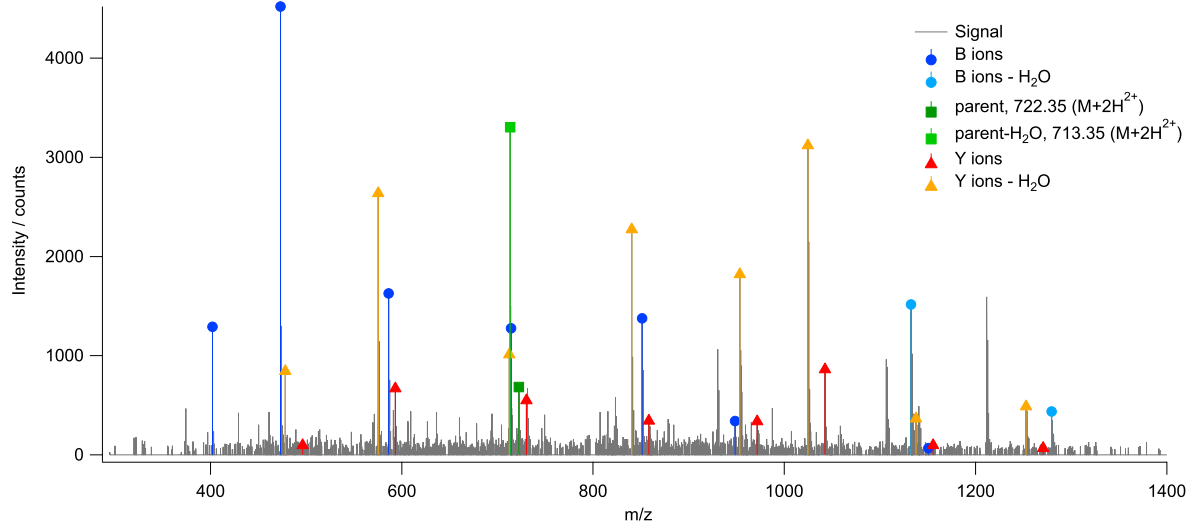

Fragment Ion Table, monoisotopic masses

| Seq  | #  | (Exp)       | B                             | Y          | (Exp)                         | # (+1) |
|------|----|-------------|-------------------------------|------------|-------------------------------|--------|
| Ac-M | 1  |             | 174.05896                     | 1443.70954 |                               | 11     |
| D    | 2  |             | 289.08590                     | 1270.65846 | (1270.6570)                   | 10     |
|      |    |             |                               |            | (1252.6548 -H <sub>2</sub> O) |        |
| I    | 3  | (402.1675)  | 402.16996                     | 1155.63152 | (1155.6046)                   | 9      |
|      |    |             |                               |            | (1137.6066 -H <sub>2</sub> O) |        |
| A    | 4  | (473.2060)  | 473.20708                     | 1042.54745 | (1042.5411)                   | 8      |
|      |    |             |                               |            | (1024.5313 -H <sub>2</sub> O) |        |
| I    | 5  | (586.2855)  | 586.29114                     | 971.51034  | (971.5105)                    | 7      |
|      |    |             |                               |            | (953.4930 -H <sub>2</sub> O)  |        |
| Q    | 6  | (714.3478)  | 714.34972                     | 858.42628  | (858.4221)                    | 6      |
|      |    |             |                               |            | (840.4142 -H <sub>2</sub> O)  |        |
| H    | 7  | (851.4028)  | 851.40863                     | 730.36770  | (730.3606)                    | 5      |
|      |    |             |                               |            | (712.3567 -H <sub>2</sub> O)  |        |
| P    | 8  | (948.4550)  | 948.46139                     | 593.30879  | (593.3040)                    | 4      |
|      |    |             |                               |            | (575.2950 -H <sub>2</sub> O)  |        |
| W+16 | 9  | (1150.5259) | 1150.53560                    | 496.25602  | (496.2509)                    | 3      |
|      |    |             | (1132.5160 -H <sub>2</sub> O) |            | (478.2413 -H <sub>2</sub> O)  |        |
| F    | 10 |             | 1297.60402                    | 294.18181  |                               | 2      |
|      |    |             | (1279.5856 -H <sub>2</sub> O) |            |                               |        |
| K    | 11 |             | 1425.69898                    | 147.11340  |                               | 1      |

**Mass/Charge Table**

|                      | Mass       |            |
|----------------------|------------|------------|
|                      | Mono       | Avg        |
| (M)                  | 1442.70172 | 1443.65199 |
| (M+H) <sup>+</sup>   | 1443.70954 | 1444.65993 |
| (M+2H) <sup>2+</sup> | 722.35871  | 722.83395  |
| (M+3H) <sup>3+</sup> | 481.90843  | 482.22530  |
| (M+4H) <sup>4+</sup> | 361.68329  | 361.92097  |

Modifications:

\* To residue W added the value 15.9949

\* N-terminus modification: 42.0106

**$\alpha$ A crystallin, W+31.9898**  
 Sequence: Ac-MDIAIQHPWFK, pI: 6.49531

Retention time 25.6 min  
**Fragmentation of 730.35 (M+2H)<sup>2+</sup>**

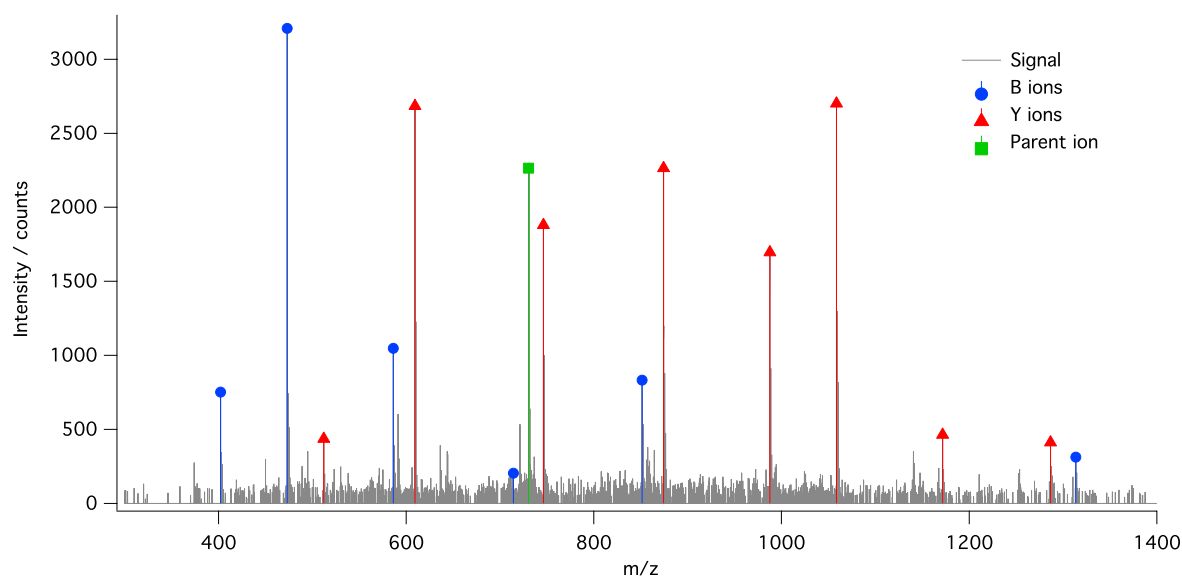

Fragment Ion Table, monoisotopic masses

| Seq  | #  | (Exp)       | B          | Y          | (Exp)       | # (+1) |
|------|----|-------------|------------|------------|-------------|--------|
| Ac-M | 1  |             | 174.05896  | 1459.70444 |             | 11     |
| D    | 2  |             | 289.08590  | 1286.65336 | (1286.6462) | 10     |
| I    | 3  | (402.1614)  | 402.16996  | 1171.62642 | (1171.6321) | 9      |
| A    | 4  | (473.2060)  | 473.20708  | 1058.54235 | (1058.5355) | 8      |
| I    | 5  | (586.2929)  | 586.29114  | 987.50524  | (987.5021)  | 7      |
| Q    | 6  | (714.3437)  | 714.34972  | 874.42118  | (874.4149)  | 6      |
| H    | 7  | (851.4028)  | 851.40863  | 746.36260  | (746.3622)  | 5      |
| P    | 8  |             | 948.46139  | 609.30369  | (609.3014)  | 4      |
| W+32 | 9  |             | 1166.53050 | 512.25092  | (512.2437)  | 3      |
| F    | 10 | (1313.5934) | 1313.59892 | 294.18181  | 2           |        |
| K    | 11 |             | 1441.69388 | 147.11340  | 1           |        |

Mass/Charge Table

|                      | Mass       |            |
|----------------------|------------|------------|
|                      | Mono       | Avg        |
| (M)                  | 1458.69662 | 1459.64689 |
| (M+H) <sup>+</sup>   | 1459.70444 | 1460.65483 |
| (M+2H) <sup>2+</sup> | 730.35616  | 730.83141  |
| (M+3H) <sup>3+</sup> | 487.24006  | 487.55693  |
| (M+4H) <sup>4+</sup> | 365.68201  | 365.91970  |

Modifications:

\* To residue W added the value 31.9898

\* N-terminus modification: 42.0106

**$\alpha$ B crystallin 1-11, W9-2.017 Da**  
 Sequence: Ac-MDIAIHHPWIR, pI: 6.69056

Retention time 25.2 min  
**Fragmentation of 476.91 (M+3H)<sup>3+</sup>**

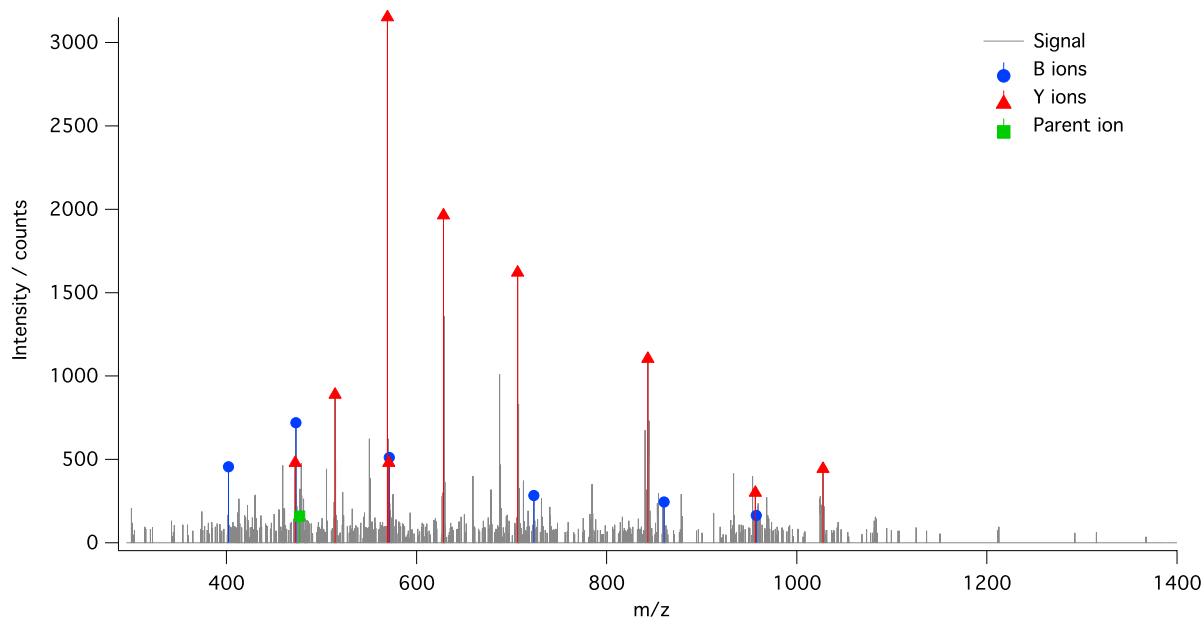

Fragment Ion Table, monoisotopic masses

| Seq  | #  | (Exp)                         | B          | Y          | (Exp)                                                                         | #  | (+1) |
|------|----|-------------------------------|------------|------------|-------------------------------------------------------------------------------|----|------|
| Ac-M | 1  |                               | 174.05896  | 1428.72118 |                                                                               | 11 |      |
| D    | 2  |                               | 289.08590  | 1255.67009 |                                                                               | 10 |      |
| I    | 3  | (402.1645)                    | 402.16996  | 1140.64315 | (628.3348 M+2H <sup>+</sup> )                                                 | 9  |      |
| A    | 4  | (473.2060)                    | 473.20708  | 1027.55909 | (570.8260 M+2H <sup>+</sup> )<br>(1027.5483)<br>(514.2803 M+2H <sup>+</sup> ) | 8  |      |
| I    | 5  |                               | 586.29114  | 956.52197  | (956.5174)                                                                    | 7  |      |
| H    | 6  | (723.3714)                    | 723.35005  | 843.43791  | (843.4409)                                                                    | 6  |      |
| H    | 7  | (860.3963)                    | 860.40896  | 706.37900  | (706.3755)                                                                    | 5  |      |
| P    | 8  | (957.5092)                    | 957.46173  | 569.32009  | (569.3171)                                                                    | 4  |      |
| W-2  | 9  |                               | 1141.52544 | 472.26732  | (472.2655)                                                                    | 3  |      |
| I    | 10 | (571.3209 M+2H <sup>+</sup> ) | 1254.60950 | 288.20361  |                                                                               | 2  |      |
| R    | 11 |                               | 1410.71061 | 175.11955  |                                                                               | 1  |      |

Mass/Charge Table

|                      | Mass       |            |
|----------------------|------------|------------|
|                      | Mono       | Avg        |
| (M)                  | 1427.71335 | 1428.64813 |
| (M+H) <sup>+</sup>   | 1428.72118 | 1429.65607 |
| (M+2H) <sup>2+</sup> | 714.86452  | 715.33202  |
| (M+3H) <sup>3+</sup> | 476.91231  | 477.22401  |
| (M+4H) <sup>4+</sup> | 357.93620  | 358.17001  |

Modifications:

\* To residue W added the value -2.0156

\* N-terminus modification: 42.0106

**$\alpha$ B crystallin 1-11, M1+15.995**  
 Sequence: Ac-MDIAIHPWIR, pI: 6.69056

Retention time 21.6 min  
**Fragmentation of 482.91 (M+3H)<sup>3+</sup>**

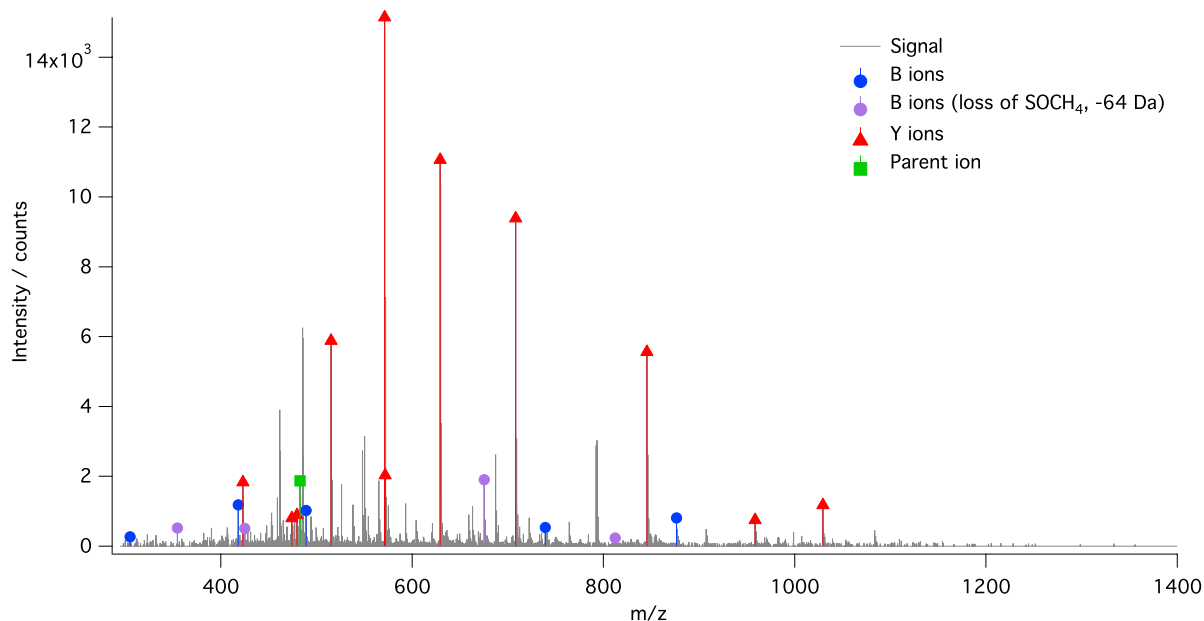

Fragment Ion Table, monoisotopic masses

| Seq     | #  | (Exp)      | B          | Y          | (Exp)                                        | # (+1) |
|---------|----|------------|------------|------------|----------------------------------------------|--------|
| Ac-M+16 | 1  |            | 190.05386  | 1446.73168 |                                              | 11     |
| D       | 2  | (305.0778) | 305.08080  | 1257.68569 |                                              | 10     |
| I       | 3  | (418.1643) | 418.16486  | 1142.65875 | (629.3443 M+2H <sup>+</sup> )                | 9      |
| A       | 4  | (489.2005) | 489.20198  | 1029.57469 | (571.8285 M+2H <sup>+</sup> )<br>(1029.5679) | 8      |
| I       | 5  |            | 602.28604  | 958.53757  | (515.291 M+2H <sup>+</sup> )<br>(958.5324)   | 7      |
| H       | 6  | (739.3403) | 739.34495  | 845.45351  | (479.7736 M+2H <sup>+</sup> )<br>(845.4446)  | 6      |
| H       | 7  | (876.4097) | 876.40386  | 708.39460  | (423.2298 M+2H <sup>+</sup> )<br>(708.3927)  | 5      |
| P       | 8  |            | 973.45663  | 571.33569  | (571.3334)                                   | 4      |
| W       | 9  |            | 1159.53594 | 474.28292  | (474.2858)                                   | 3      |
| I       | 10 |            | 1272.62000 | 288.20361  |                                              | 2      |
| R       | 11 |            | 1428.72111 | 175.11955  |                                              | 1      |

Mass/Charge Table

|                      | Mass       |            |
|----------------------|------------|------------|
|                      | Mono       | Avg        |
| (M)                  | 1445.72385 | 1446.65863 |
| (M+H) <sup>+</sup>   | 1446.73168 | 1447.66656 |
| (M+2H) <sup>2+</sup> | 723.86977  | 724.33727  |
| (M+3H) <sup>3+</sup> | 482.91581  | 483.22751  |
| (M+4H) <sup>4+</sup> | 362.43882  | 362.67263  |

Modifications:

\* To residue M added the value 15.9949

\* N-terminus modification: 42.0106

**$\alpha$ B crystallin 1-11, W9+15.995**  
 Sequence: Ac-MDIAIHPWIR, pI: 6.69056

Retention time 23.7 min  
**Fragmentation of 482.91 (M+3H)<sup>3+</sup>**

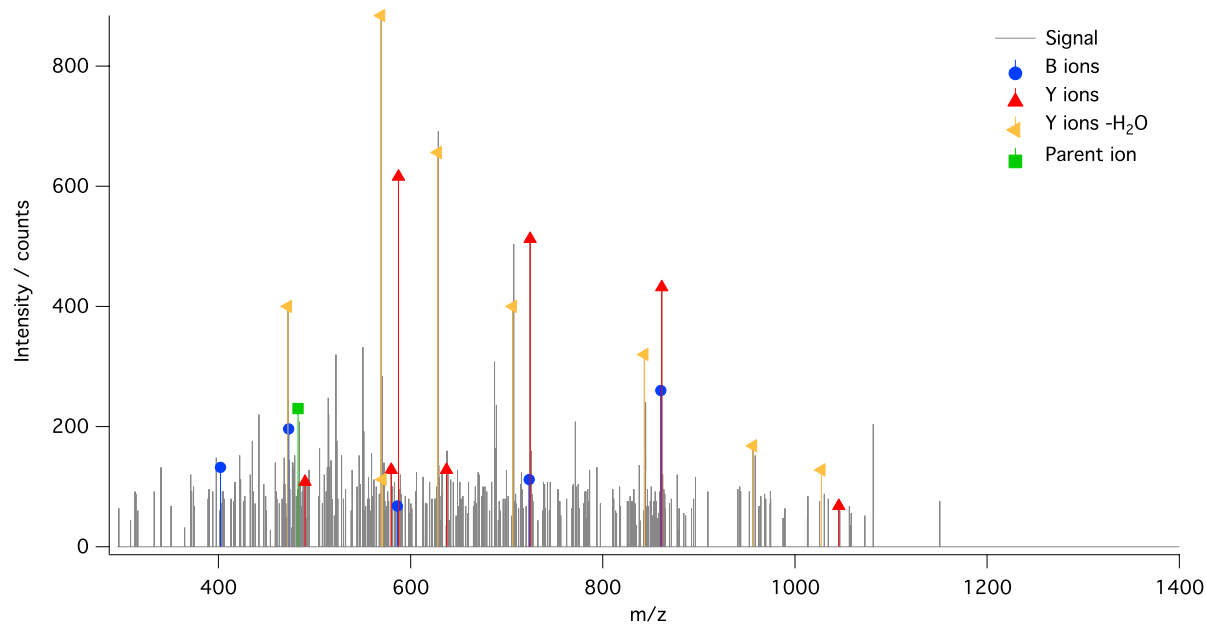

Fragment Ion Table, monoisotopic masses

| Seq  | #  | (Exp)      | B          | Y          | (Exp)                                          | # (+1) |
|------|----|------------|------------|------------|------------------------------------------------|--------|
| Ac-M | 1  |            | 174.05896  | 1446.73168 |                                                | 11     |
| D    | 2  |            | 289.08590  | 1273.68059 |                                                | 10     |
|      |    |            |            |            | (637.3393 M+2H <sup>+</sup> )                  |        |
|      |    |            |            |            | (628.3404 M+2H <sup>+</sup> -H <sub>2</sub> O) |        |
| I    | 3  | (402.1687) | 402.16996  | 1158.65365 |                                                | 9      |
|      |    |            |            |            | (579.8311 M+2H <sup>+</sup> )                  |        |
|      |    |            |            |            | (570.8276 M+2H <sup>+</sup> -H <sub>2</sub> O) |        |
| A    | 4  | (473.2074) | 473.20708  | 1045.56959 | (1045.5574)                                    | 8      |
|      |    |            |            |            | (1027.5707 -H <sub>2</sub> O)                  |        |
| I    | 5  | (586.2946) | 586.29114  | 974.53247  |                                                | 7      |
|      |    |            |            |            | (956.5200 -H <sub>2</sub> O)                   |        |
| H    | 6  | (723.3610) | 723.35005  | 861.44841  | (861.4473)                                     | 6      |
|      |    |            |            |            | (843.4432 -H <sub>2</sub> O)                   |        |
| H    | 7  | (860.3986) | 860.40896  | 724.38950  | (724.3886)                                     | 5      |
|      |    |            |            |            | (706.3773 -H <sub>2</sub> O)                   |        |
| P    | 8  |            | 957.46173  | 587.33059  | (587.3313)                                     | 4      |
|      |    |            |            |            | (569.3178 -H <sub>2</sub> O)                   |        |
| W+16 | 9  |            | 1159.53594 | 490.27782  | (490.2767)                                     | 3      |
|      |    |            |            |            | (472.2735 -H <sub>2</sub> O)                   |        |
| I    | 10 |            | 1272.62000 | 288.20361  |                                                | 2      |
| R    | 11 |            | 1428.72111 | 175.11955  |                                                | 1      |

Mass/Charge Table

|                      | Mass       |            |
|----------------------|------------|------------|
|                      | Mono       | Avg        |
| (M)                  | 1445.72385 | 1446.65863 |
| (M+H) <sup>+</sup>   | 1446.73168 | 1447.66656 |
| (M+2H) <sup>2+</sup> | 723.86977  | 724.33727  |
| (M+3H) <sup>3+</sup> | 482.91581  | 483.22751  |
| (M+4H) <sup>4+</sup> | 362.43882  | 362.67263  |

Modifications:

\* To residue W added the value 15.9949

\* N-terminus modification: 42.0106

**$\alpha$ B crystallin 57-69, W60 - 2.017 Da**  
 Sequence: APSWIDTGLSEMR, pI: 4.37040

Retention time 25.3 min  
**Fragmentation of 730.85 (M+2H)<sup>2+</sup>**

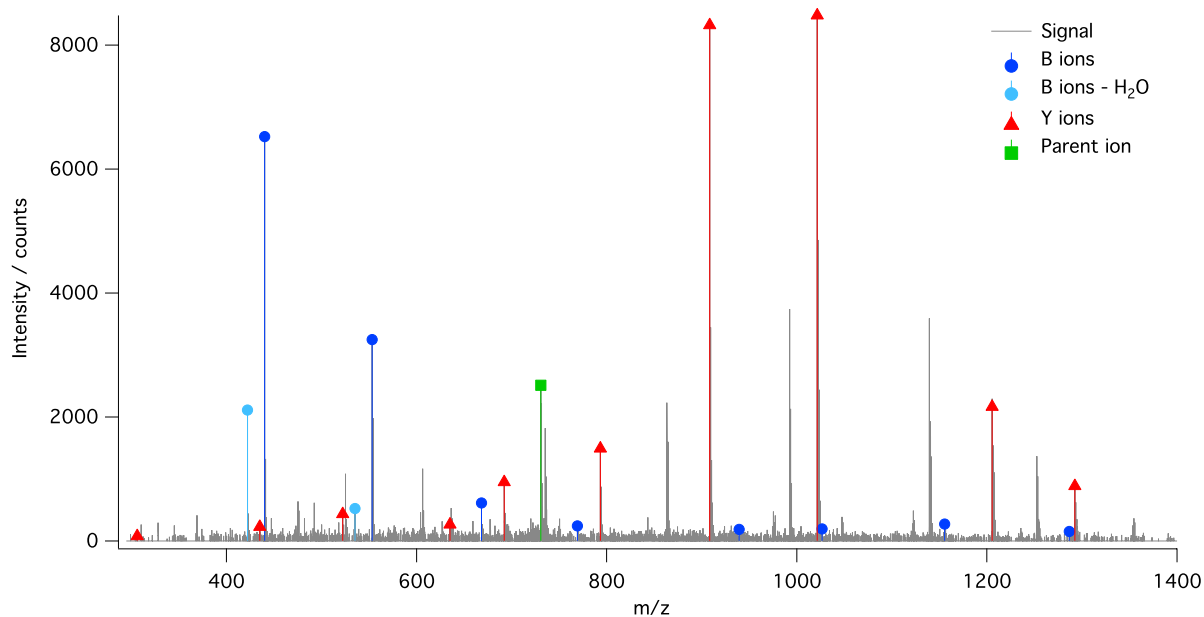

Fragment Ion Table, monoisotopic masses

| Seq | #  | (Exp)                        | B          | Y          | (Exp)       | # (+1) |
|-----|----|------------------------------|------------|------------|-------------|--------|
| A   | 1  |                              | 72.04498   | 1460.68448 |             | 13     |
| P   | 2  |                              | 169.09775  | 1389.64737 |             | 12     |
| S   | 3  |                              | 256.12978  | 1292.59460 | (1292.5841) | 11     |
| W-2 | 4  | (440.1932)                   | 440.19349  | 1205.56258 | (1205.5620) | 10     |
|     |    | (422.1812 -H <sub>2</sub> O) |            |            |             |        |
| I   | 5  | (553.2791)                   | 553.27755  | 1021.49886 | (1021.4937) | 9      |
|     |    | (535.2575 -H <sub>2</sub> O) |            |            |             |        |
| D   | 6  | (668.3018)                   | 668.30449  | 908.41480  | (908.4143)  | 8      |
| T   | 7  | (769.3506)                   | 769.35217  | 793.38786  | (793.3880)  | 7      |
| G   | 8  |                              | 826.37364  | 692.34018  | (692.3432)  | 6      |
| L   | 9  | (939.4434)                   | 939.45770  | 635.31872  | (635.3056)  | 5      |
| S   | 10 | (1026.5054)                  | 1026.48973 | 522.23465  | (522.2314)  | 4      |
| E   | 11 | (1155.5258)                  | 1155.53232 | 435.20262  | (435.2028)  | 3      |
| M   | 12 | (1286.5687)                  | 1286.57281 | 306.16003  | (306.1520)  | 2      |
| R   | 13 |                              | 1442.67392 | 175.11955  |             | 1      |

Mass/Charge Table

|                      | Mass       |            |
|----------------------|------------|------------|
|                      | Mono       | Avg        |
| (M)                  | 1459.67666 | 1460.62481 |
| (M+H) <sup>+</sup>   | 1460.68448 | 1461.63275 |
| (M+2H) <sup>2+</sup> | 730.84618  | 731.32036  |
| (M+3H) <sup>3+</sup> | 487.56674  | 487.88290  |
| (M+4H) <sup>4+</sup> | 365.92702  | 366.16418  |

Modifications:

\* To residue W added the value -2.0156

**$\alpha$ B crystallin 57-69, M68 + 15.995 Da**  
 Sequence: APSWIDTGLSEMR, pI: 4.37040

Retention time 21.8 min  
**Fragmentation of ion 739.85 (M+2H)<sup>2</sup>**

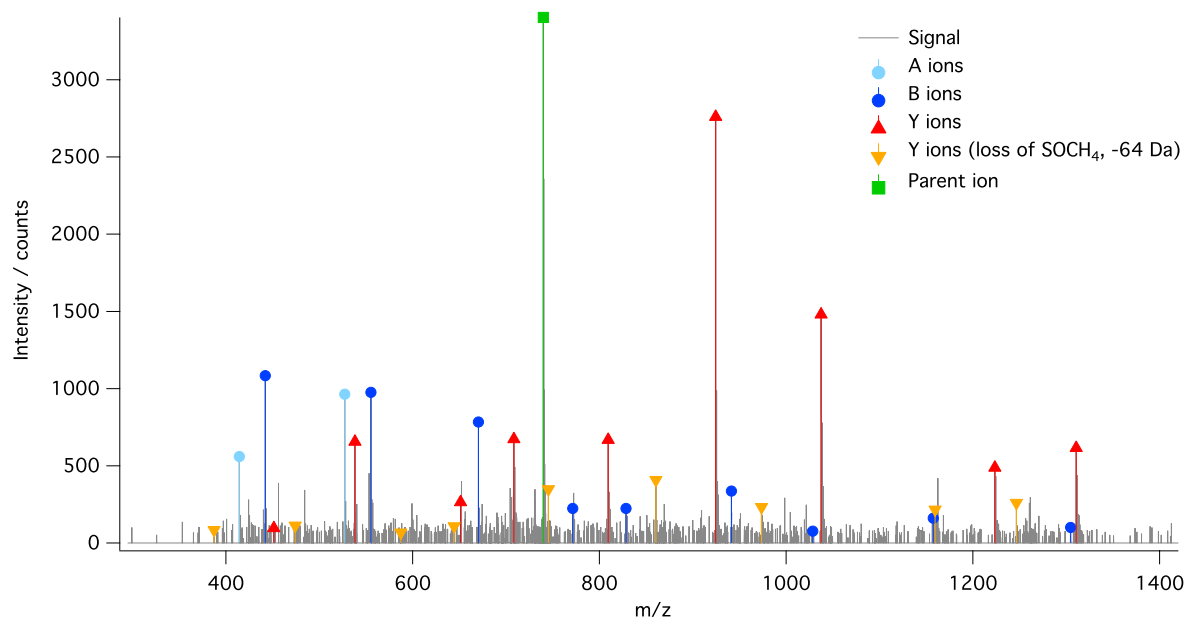

Fragment Ion Table, monoisotopic masses

| Seq  | #  | (Exp)                           | B          | Y          | (Exp)                           | # (+1) |
|------|----|---------------------------------|------------|------------|---------------------------------|--------|
| A    | 1  |                                 | 72.04498   | 1478.69498 |                                 | 13     |
| P    | 2  |                                 | 169.09775  | 1407.65787 | (1407.6582)                     | 12     |
|      |    |                                 |            |            | (704.3305 M+2H <sup>+</sup> )   |        |
| S    | 3  |                                 | 256.12978  | 1310.60510 | (1310.6022)                     | 11     |
|      |    |                                 |            |            | (1246.5961 -SOCH <sub>4</sub> ) |        |
| W    | 4  | (442.2083)                      | 442.20909  | 1223.57308 | (1223.5662)                     | 10     |
|      |    | (414.2117 -CO, a <sub>4</sub> ) |            |            | (1159.5698 -SOCH <sub>4</sub> ) |        |
|      |    | (424.1969 -H <sub>2</sub> O)    |            |            |                                 |        |
| I    | 5  | (555.2918)                      | 555.29315  | 1037.49376 | (1037.4894)                     | 9      |
|      |    | (527.2962 -CO, a <sub>5</sub> ) |            |            | (973.4951 -SOCH <sub>4</sub> )  |        |
| D    | 6  | (670.3146)                      | 670.32009  | 924.40970  | (924.4023)                      | 8      |
|      |    |                                 |            |            | (860.4095 -SOCH <sub>4</sub> )  |        |
| T    | 7  | (771.3650)                      | 771.36777  | 809.38276  | (809.3815)                      | 7      |
|      |    |                                 |            |            | (745.3779 -SOCH <sub>4</sub> )  |        |
| G    | 8  | (828.3839)                      | 828.38924  | 708.33508  | (708.3339)                      | 6      |
|      |    |                                 |            |            | (644.3394 -SOCH <sub>4</sub> )  |        |
| L    | 9  | (941.4709)                      | 941.47330  | 651.31362  | (651.3086)                      | 5      |
|      |    |                                 |            |            | (587.3171 -SOCH <sub>4</sub> )  |        |
| S    | 10 | (1028.5016)                     | 1028.50533 | 538.22955  | (538.2260)                      | 4      |
|      |    |                                 |            |            | (474.2352 -SOCH <sub>4</sub> )  |        |
| E    | 11 | (1157.5492)                     | 1157.54792 | 451.19752  | (451.1953)                      | 3      |
|      |    |                                 |            |            | (387.2030 -SOCH <sub>4</sub> )  |        |
| M+16 | 12 | (1304.5782)                     | 1304.58331 | 322.15493  | (322.1555)                      | 2      |
| R    | 13 |                                 | 1460.68442 | 175.11955  |                                 | 1      |

Mass/Charge Table

|                      | Mass       |            |
|----------------------|------------|------------|
|                      | Mono       | Avg        |
| (M)                  | 1477.68716 | 1478.63531 |
| (M+H) <sup>+</sup>   | 1478.69498 | 1479.64324 |
| (M+2H) <sup>2+</sup> | 739.85143  | 740.32561  |
| (M+3H) <sup>3+</sup> | 493.57024  | 493.88640  |
| (M+4H) <sup>4+</sup> | 370.42965  | 370.66680  |

Modifications:

\* To residue M added the value 15.9949

**$\alpha$ B crystallin 57-69, W60 + 15.995 Da**  
 Sequence: APSWIDTGLSEMR, pI: 4.37040

Retention time 22.7 min  
**Fragmentation of ion 739.85 (M+2H)<sup>2</sup>**

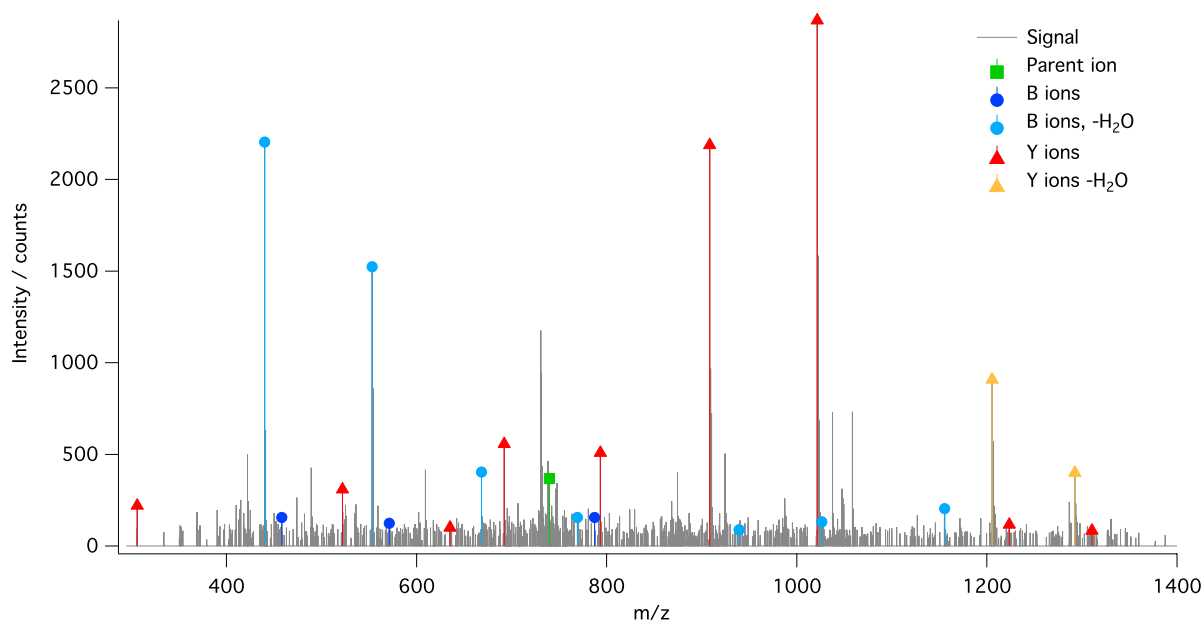

Fragment Ion Table, monoisotopic masses

| Seq  | #  | (Exp)                         | B          | Y          | (Exp)                         | # (+1) |
|------|----|-------------------------------|------------|------------|-------------------------------|--------|
| A    | 1  |                               | 72.04498   | 1478.69498 |                               | 13     |
| P    | 2  |                               | 169.09775  | 1407.65787 |                               | 12     |
| S    | 3  |                               | 256.12978  | 1310.60510 | (1310.6132)                   | 11     |
|      |    |                               |            |            | (1292.5939 -H <sub>2</sub> O) |        |
| W+16 | 4  | (458.2345)                    | 458.20399  | 1223.57308 | (1223.5500)                   | 10     |
|      |    | (440.1880 -H <sub>2</sub> O)  |            |            | (1205.5504 -H <sub>2</sub> O) |        |
| I    | 5  | (571.2629)                    | 571.28805  | 1021.49886 | (1021.4983)                   | 9      |
|      |    | (553.2730 -H <sub>2</sub> O)  |            |            |                               |        |
| D    | 6  |                               | 686.31499  | 908.41480  | (908.4097)                    | 8      |
|      |    | (668.2985 -H <sub>2</sub> O)  |            |            |                               |        |
| T    | 7  | (787.3810)                    | 787.36267  | 793.38786  | (793.3840)                    | 7      |
|      |    | (769.3511 -H <sub>2</sub> O)  |            |            |                               |        |
| G    | 8  |                               | 844.38414  | 692.34018  | (692.3399)                    | 6      |
| L    | 9  |                               | 957.46820  | 635.31872  | (635.3142)                    | 5      |
|      |    | (939.4528 -H <sub>2</sub> O)  |            |            |                               |        |
| S    | 10 |                               | 1044.50023 | 522.23465  | (522.2255)                    | 4      |
|      |    | (1026.4903 -H <sub>2</sub> O) |            |            |                               |        |
| E    | 11 |                               | 1173.54282 | 435.20262  |                               | 3      |
|      |    | (1155.5302 -H <sub>2</sub> O) |            |            |                               |        |
| M    | 12 |                               | 1304.58331 | 306.16003  | (306.1561)                    | 2      |
| R    | 13 |                               | 1460.68442 | 175.11955  |                               | 1      |

Mass/Charge Table

|                      | Mass       |            |
|----------------------|------------|------------|
|                      | Mono       | Avg        |
| (M)                  | 1477.68716 | 1478.63531 |
| (M+H) <sup>+</sup>   | 1478.69498 | 1479.64324 |
| (M+2H) <sup>2+</sup> | 739.85143  | 740.32561  |
| (M+3H) <sup>3+</sup> | 493.57024  | 493.88640  |
| (M+4H) <sup>4+</sup> | 370.42965  | 370.66680  |

Modifications: \* To residue W added the value 15.9949
